# Supplementary material for: Biologics and Small Molecule Inhibitors for Treating Hidradenitis Suppurativa: A Systematic Review and Meta-Analysis
Source: MDPI journal article supplement (doi:10.3390/biomedicines10061303), 2022-06-02
Supplement: s1 [file s1]

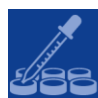

**Table S1.** Search strategy Cochrane library, Embase, and Medline (Ovid)

1

| Cochrane library |                                                                                                                                                                                                                                                                                                                                                                                                                                                                                                                                                                                                                               |
|------------------|-------------------------------------------------------------------------------------------------------------------------------------------------------------------------------------------------------------------------------------------------------------------------------------------------------------------------------------------------------------------------------------------------------------------------------------------------------------------------------------------------------------------------------------------------------------------------------------------------------------------------------|
| #1               | MeSH descriptor: [Hidradenitis Suppurativa] explode all trees                                                                                                                                                                                                                                                                                                                                                                                                                                                                                                                                                                 |
| #2               | acne invers*                                                                                                                                                                                                                                                                                                                                                                                                                                                                                                                                                                                                                  |
| #3               | invers* acne                                                                                                                                                                                                                                                                                                                                                                                                                                                                                                                                                                                                                  |
| #4               | hidradeniti* suppurativ*                                                                                                                                                                                                                                                                                                                                                                                                                                                                                                                                                                                                      |
| #5               | suppurativ* hidradeniti*                                                                                                                                                                                                                                                                                                                                                                                                                                                                                                                                                                                                      |
| #6               | velpeau* disease                                                                                                                                                                                                                                                                                                                                                                                                                                                                                                                                                                                                              |
| #7               | verneuil* disease                                                                                                                                                                                                                                                                                                                                                                                                                                                                                                                                                                                                             |
| #8               | #1 or #2 or #3 or #4 or #5 or #6 or #7                                                                                                                                                                                                                                                                                                                                                                                                                                                                                                                                                                                        |
| Embase           |                                                                                                                                                                                                                                                                                                                                                                                                                                                                                                                                                                                                                               |
| #1               | 'acne invers*':ab,ti                                                                                                                                                                                                                                                                                                                                                                                                                                                                                                                                                                                                          |
| #2               | 'invers* acne':ab,ti                                                                                                                                                                                                                                                                                                                                                                                                                                                                                                                                                                                                          |
| #3               | 'hidradeniti* suppurativ*':ab,ti                                                                                                                                                                                                                                                                                                                                                                                                                                                                                                                                                                                              |
| #4               | 'suppurativ* hidradeniti*':ab,ti                                                                                                                                                                                                                                                                                                                                                                                                                                                                                                                                                                                              |
| #5               | 'velpeau* disease':ab,ti                                                                                                                                                                                                                                                                                                                                                                                                                                                                                                                                                                                                      |
| #6               | 'verneuil* disease':ab,ti                                                                                                                                                                                                                                                                                                                                                                                                                                                                                                                                                                                                     |
| #7               | 'suppurative hidradenitis'/exp OR 'hidradenitis suppurativa' OR 'suppurativa, hidradenitis' OR 'suppurative hidradenitis'                                                                                                                                                                                                                                                                                                                                                                                                                                                                                                     |
| #8               | #1 OR #2 OR #3 OR #4 OR #5 OR #6 OR #7                                                                                                                                                                                                                                                                                                                                                                                                                                                                                                                                                                                        |
| #9               | 'crossover procedure':lnk OR 'cross over clinical study' OR 'cross over clinical trial' OR 'cross over comparison' OR 'cross over design' OR 'cross over method' OR 'cross over procedure' OR 'cross over study' OR 'cross over test' OR 'cross over trial' OR 'cross-over studies' OR 'crossover clinical study' OR 'crossover clinical trial' OR 'crossover comparison' OR 'crossover design' OR 'crossover method' OR 'crossover procedure' OR 'crossover study' OR 'crossover test' OR 'crossover trial' OR 'double blind cross over study' OR 'double blind crossover study' OR 'procedure, crossover'                   |
| #10              | 'double blind procedure':lnk OR 'double blind clinical trial' OR 'double blind comparison' OR 'double blind design' OR 'double blind procedure' OR 'double blind studies' OR 'double blind study' OR 'double blind test' OR 'double blind trial' OR 'double masked clinical study' OR 'double masked clinical trial' OR 'double masked comparison' OR 'double masked design' OR 'double masked method' OR 'double masked procedure' OR 'double masked study' OR 'double masked test' OR 'double masked trial' OR 'double-blind clinical study' OR 'double-blind method'                                                       |
| #11              | 'single blind procedure':lnk OR 'procedure, single blind' OR 'single blind clinical study' OR 'single blind clinical trial' OR 'single blind comparison' OR 'single blind design' OR 'single blind procedure' OR 'single blind studies' OR 'single blind study' OR 'single blind test' OR 'single blind trial' OR 'single masked clinical study' OR 'single masked clinical trial' OR 'single masked comparison' OR 'single masked design' OR 'single masked method' OR 'single masked procedure' OR 'single masked study' OR 'single masked test' OR 'single masked trial' OR 'single-blind method' OR 'study, single blind' |
| #12              | crossover?:ti,ab,kw,de OR 'cross over?':ti,ab,kw,de                                                                                                                                                                                                                                                                                                                                                                                                                                                                                                                                                                           |
| #13              | PBO*:ti,ab,kw,de                                                                                                                                                                                                                                                                                                                                                                                                                                                                                                                                                                                                              |
| #14              | doubl*:ti,ab,kw,de AND near:ti,ab,kw,de AND blind*:ti,ab,kw,de                                                                                                                                                                                                                                                                                                                                                                                                                                                                                                                                                                |

|                                                                                                                                            |                                                                                                                                                                                                                                                                                                          |
|--------------------------------------------------------------------------------------------------------------------------------------------|----------------------------------------------------------------------------------------------------------------------------------------------------------------------------------------------------------------------------------------------------------------------------------------------------------|
| #15                                                                                                                                        | allocat*:ti,ab,kw,de                                                                                                                                                                                                                                                                                     |
| #16                                                                                                                                        | trial:ti                                                                                                                                                                                                                                                                                                 |
| #17                                                                                                                                        | 'randomized controlled trial':lnk OR 'controlled trial, randomized' OR 'randomised controlled study' OR 'randomised controlled trial' OR 'randomized controlled study' OR 'randomized controlled trial' OR 'trial, randomized controlled'                                                                |
| #18                                                                                                                                        | random*:ti,ab,kw,de                                                                                                                                                                                                                                                                                      |
| #19                                                                                                                                        | #9 OR #10 OR #11 OR #12 OR #13 OR #14 OR #15 OR #16 OR #17 OR #18                                                                                                                                                                                                                                        |
| #20                                                                                                                                        | ('animal'/de OR 'nonhuman'/de OR 'animal experiment'/de OR 'animal experiment' OR 'animal experimentation' OR 'animal physical conditioning' OR 'animal studies' OR 'animal study' OR 'animal trial' OR 'experiment, animal' OR 'physical conditioning, animal') AND ('human'/de OR 'human' OR 'humans') |
| #21                                                                                                                                        | 'animal'/de OR 'nonhuman'/de OR 'animal experiment'/de OR 'animal experiment' OR 'animal experimentation' OR 'animal physical conditioning' OR 'animal studies' OR 'animal study' OR 'animal trial' OR 'experiment, animal' OR 'physical conditioning, animal'                                           |
| #22                                                                                                                                        | #21 NOT #20                                                                                                                                                                                                                                                                                              |
| #23                                                                                                                                        | #19 NOT #22                                                                                                                                                                                                                                                                                              |
| #24                                                                                                                                        | #8 AND #23                                                                                                                                                                                                                                                                                               |
| #25                                                                                                                                        | #24 AND [embase]/lim NOT ([embase]/lim AND [medline]/lim)                                                                                                                                                                                                                                                |
| <b>Medline (Ovid)</b>                                                                                                                      |                                                                                                                                                                                                                                                                                                          |
| 1                                                                                                                                          | exp Hidradenitis Suppurativa/                                                                                                                                                                                                                                                                            |
| 2                                                                                                                                          | acne invers\$1.ti,ab.                                                                                                                                                                                                                                                                                    |
| 3                                                                                                                                          | invers\$ acne.ti,ab.                                                                                                                                                                                                                                                                                     |
| 4                                                                                                                                          | hidradeniti\$ suppurativ\$.ti,ab.                                                                                                                                                                                                                                                                        |
| 5                                                                                                                                          | suppurativ\$ hidradeniti\$.ti,ab.                                                                                                                                                                                                                                                                        |
| 6                                                                                                                                          | velpeau\$ disease.ti,ab.                                                                                                                                                                                                                                                                                 |
| 7                                                                                                                                          | verneuil\$ disease.ti,ab.                                                                                                                                                                                                                                                                                |
| 8                                                                                                                                          | or/1-7                                                                                                                                                                                                                                                                                                   |
| 9                                                                                                                                          | randomized controlled trial.pt.                                                                                                                                                                                                                                                                          |
| 10                                                                                                                                         | controlled clinical trial.pt.                                                                                                                                                                                                                                                                            |
| 11                                                                                                                                         | randomized.ab.                                                                                                                                                                                                                                                                                           |
| 12                                                                                                                                         | PBO.ab.                                                                                                                                                                                                                                                                                                  |
| 13                                                                                                                                         | clinical trials as topic.sh.                                                                                                                                                                                                                                                                             |
| 14                                                                                                                                         | randomly.ab.                                                                                                                                                                                                                                                                                             |
| 15                                                                                                                                         | trial.ti.                                                                                                                                                                                                                                                                                                |
| 16                                                                                                                                         | 9 or 10 or 11 or 12 or 13 or 14 or 15                                                                                                                                                                                                                                                                    |
| 17                                                                                                                                         | exp animals/ not humans.sh.                                                                                                                                                                                                                                                                              |
| 18                                                                                                                                         | 16 not 17                                                                                                                                                                                                                                                                                                |
| 19                                                                                                                                         | 8 and 18                                                                                                                                                                                                                                                                                                 |
| [Lines 9-18: Cochrane Highly Sensitive Search Strategy for identifying randomized trials in MEDLINE: sensitivity- and precision-maximizing |                                                                                                                                                                                                                                                                                                          |

**Table S2.** Summary of Included Randomized Controlled Trials

| Author,<br>year,<br>country                     | Registration                | Period /<br>Primary<br>endpoint           | Severity         | Intervention | Dose                                      | Mean age<br>(SD) | Sex<br>(M/F) | Tool            | Result                                                                       |
|-------------------------------------------------|-----------------------------|-------------------------------------------|------------------|--------------|-------------------------------------------|------------------|--------------|-----------------|------------------------------------------------------------------------------|
| Alavi<br>2022,<br>Canda,<br>Denmark,<br>Germany | NCT<br>03607487             | NA /<br>8 weeks                           | Hurley<br>II/III | INCB054707   | 30mg QD                                   | 41(11.53)        | 2/7          | HiSCR           | INCB: 5/9(55.6%), 5/9(55.6%), 7/8(87.5%); PBO:<br>4/7(57.1%)                 |
|                                                 |                             |                                           |                  |              | 60mg QD                                   | 42.2<br>(11.96)  | 1/8          | IHS4            |                                                                              |
|                                                 |                             |                                           |                  |              | 90mg QD                                   | 42.8<br>(14.62)  | 3/5          | MSS             | Mean change: INCB: -9.4(6.8), -21.4(21.4), -<br>16.1(22.9); PBO: -10.7(21.0) |
|                                                 |                             |                                           |                  |              |                                           |                  |              | HiSQoL          | Mean change: INCB: -2.2(2.2), -1.4(1.4), -3.1(3.3);<br>PBO: 0.3(2.8)         |
|                                                 |                             |                                           |                  |              |                                           |                  |              |                 |                                                                              |
|                                                 |                             |                                           |                  | PBO          | X                                         | 40.3<br>(16.70)  | 1/8          | DLQI            | Mean change: INCB: -7.2(7.1), -4.2(4.2), -5.8(4.7),<br>0.9(6.5)              |
|                                                 |                             |                                           |                  |              |                                           |                  |              | NRS for<br>pain | Mean change: INCB: -2.2(2.18), -1.4(1.44), -3.1<br>(3.28); PBO: 0.3(2.77)    |
| Bechara<br>2021,<br>Germany                     | NCT<br>02808975<br>(SHARPS) | Jul. 2016<br>– Oct.<br>2019 / 12<br>weeks | Hurley<br>II/III | ADA          | 160mg<br>Wk0→<br>80mg Wk<br>2→ 40mg<br>QW | 38.5(11.7)       | 52/51        | HiSCR           | ADA:49/103(47.6%), PBO:35/103(34%)                                           |
|                                                 |                             |                                           |                  |              |                                           |                  |              | DLQI            | Mean change: ADA: -4.8; PBO: -1.3                                            |
|                                                 |                             |                                           |                  | PBO          | X                                         | 36.8(10.8)       | 48/55        | HSIA            | Mean change: ADA: -1.83; PBO: -0.37                                          |
|                                                 |                             |                                           |                  |              |                                           |                  |              | HSSA            | Mean change: ADA: -2.03; PBO: -0.53                                          |
|                                                 |                             |                                           |                  |              |                                           |                  |              | PtGA            | Mean change: ADA -2.0, PBO: -0.5                                             |

Table S2. Cont.

| Author, year, country                                       | Registration | Period / Primary endpoint      | Severity      | Intervention | Dose                      | Mean age (SD) | Sex (M/F) | Tool                                                       | Result                                                                                                             |
|-------------------------------------------------------------|--------------|--------------------------------|---------------|--------------|---------------------------|---------------|-----------|------------------------------------------------------------|--------------------------------------------------------------------------------------------------------------------|
| Jassen Research & Development LLC 2021, USA, Canada, Europe | NCT 03628924 | Sep. 2018 –May 2020 / 16 weeks | Hurley II/III | Guselkumab   | 200mg SC                  | 39 (12.3)     | 27/32     | HiSCR                                                      | Guselkumba: 30/59(50.8%), 27/60(45%); PBO: 24/62(38.7%)                                                            |
|                                                             |              |                                |               |              | 1200mg IV to 200mg SC     | 37.2 (10.9)   | 15/45     | DLQI                                                       | Mean change: Guselkumab: -3.4 (6.81), -2.5(6.13); PBO: -0.7 (5.17)                                                 |
|                                                             |              |                                |               |              |                           |               |           | HSSD                                                       | Mean change: Guselkumab: -1.71 (2.325), -0.82(2.148); PBO: -0.19 (2.124)                                           |
|                                                             |              |                                |               | HS-IGA 0/1   |                           |               |           | Guselkumab: 17/59(28.8%), 14/60(23.3%) ; PBO: 15/62(24.2%) |                                                                                                                    |
|                                                             |              |                                |               | PBO          |                           |               |           | HADS                                                       | Mean change:Anxiety/Depression: Guselkumab: 0.0(2.82)/-0.6(2.73), -0.3(2.56)/-0.5 (2.69); PBO: 0.0(2.60)/0.2(2.48) |
|                                                             |              |                                |               |              | PBO                       | 38.2 (11.6)   | 24/38     |                                                            |                                                                                                                    |
| Glatt 2021, USA, Europe, Australia, Russia                  | NCT 03248531 | Sep. 2017 –Feb. 2019 /12 weeks | Hurley II/III | Bimekizumab  | 640mg W0→ 320mg Q2W       | 37.4 (11.9)   | 16/30     | HiSCR                                                      | Bimekizumab: 25/40 (63%), ADA: 12/18(67%), PBO: 5/18(28%)                                                          |
|                                                             |              |                                |               | ADA          | 160mg W0 →80mgW2 →40mg QW | 31.1 (9.4)    | 4/17      | IHS4                                                       | Bimekizumab: 16.0(18), ADA: 16.5, PBO: 40.2(32.6)                                                                  |
|                                                             |              |                                |               |              |                           |               |           | DLQI 0/1                                                   | Bimekizumab: 14/39 (36%), ADA: 3/21(14%), PBO:0                                                                    |
|                                                             |              |                                |               | PBO          | X                         | 40.7 (12.8)   | 7/14      | PtGA                                                       | ≥30% and ≥1 unit reduction: Bimekizumab: 27/42(64%), ADA: 9/18(50%), PBO: 7/19(37%)                                |

**Table S2.** *Cont.*

| Author, year, country                 | Registration | Period / Primary endpoint | Severity      | Intervention | Dose                    | Mean age (SD) | Sex (M/F) | Tool   | Result                                                                                                      |
|---------------------------------------|--------------|---------------------------|---------------|--------------|-------------------------|---------------|-----------|--------|-------------------------------------------------------------------------------------------------------------|
| Giamarellos 2021, USA, Canada, Europe | NCT 03487276 | NA / 16 weeks             | Hurley II/III | IFX-1        | 400mg Q4W               | 39            | 18/16     | HiSCR  | IFX-1: 12/30 (40%), 17/33 (51.5%), 12/31 (38.7%), 15/33 (45.5%); PBO:16/34 (47.1)                           |
|                                       |              |                           |               |              | 800mg Q4W               | 35            | 17/18     | MSS    | Absolute change (D1-D309): IFX-1: -17.5 (48.43), -29.4 (32.35), -22.9(52), -35.2(101.9); PBO: -16.4 (30.78) |
|                                       |              |                           |               |              | 800mg Q2W               | 37            | 16/20     | DLQI   | Absolute change (D1-D309): IFX-1: 0.6(6.39), -2.6(7.19), -5.0(5.90), -2.4 (5.24); PBO: -1.5(6.11)           |
|                                       |              |                           |               |              | 1200mg Q2W              | 33.5          | 13/23     |        |                                                                                                             |
|                                       |              |                           |               | PBO          | X                       | 34.5          | 15/21     | PtGA   | Absolute change (D1-D309): IFX-1: -0.1(2.68), -0.7(2.37), -1.5 (2.92), -1.8 (3.03); PBO: -1.2 (2.82)        |
|                                       |              |                           |               |              |                         |               |           | IHS4   | Mean change: IFX-1(1200mg) 51.5%; PBO: 19.8%                                                                |
| Kirby 2021, USA                       | NCT 03852472 | NA / 12 weeks             | Hurley II/III | Avacopan     | 10mg BID                | X             | 134       | HiSCR  | Avacopan: 30/134 (22.4%), 47/134 (35.1%); PBO: 40/130 (30.8%)                                               |
|                                       |              |                           |               |              | 30mg BID                |               | 134       |        |                                                                                                             |
|                                       |              |                           |               | PBO          | PBO                     |               | 130       |        |                                                                                                             |
| Kimball 2020, USA, Europe             | NCT 02421172 | NA / 16 weeks             | Hurley II/III | CJM112       | 300mg QW*5→ bi-weekly*5 | 36(9.8)       | 11/22     | HS-PGA | CJM112:10/31(32.3%), PBO: 4/32 (12.5%)                                                                      |
|                                       |              |                           |               | PBO          | X                       | 39(10.9)      | 11/22     |        |                                                                                                             |

**Table S2.** *Cont.*

| Author,<br>year,<br>country    | Registration               | Period /<br>Primary<br>endpoint        | Severity           | Intervention | Dose                                                 | Mean age<br>(SD) | Sex<br>(M/F) | Tool            | Result                                                                                   |
|--------------------------------|----------------------------|----------------------------------------|--------------------|--------------|------------------------------------------------------|------------------|--------------|-----------------|------------------------------------------------------------------------------------------|
| Vossen<br>2019,<br>Netherlands | EudraCT 2016-<br>000859-27 | Feb. 2017 -<br>Aug. 2017 /<br>16 weeks | HS-PGA<br>moderate | Apremilast   | 10mg on D1<br>→ increase of<br>10 mg/d →<br>30mg BID | 35.7 (13)        | 3 /12        | HiSCR           | APR: 8/15(53.3%), PBO: 0                                                                 |
|                                |                            |                                        |                    |              |                                                      |                  |              | DLQI            | Mean change: APR: -2.3; PBO: +4.2                                                        |
|                                |                            |                                        |                    | PBO          | X                                                    | 33.4 (8.2)       | 0/5          | NRS             | Mean change: Pain/itch/disease burden:<br>APR: -0.8 / -1.1/ -1.0;<br>PBO: +2.2/+2.4/+0.9 |
| Kanni<br>2018,<br>Greece       | NCT<br>02643654            | Dec. 2015 -<br>Jan.2017 /<br>12 weeks  | Hurley<br>II/III   | MABp1        | 7.5mg/kg<br>Q2W                                      | 46.6(15.1)       | 7/3          | HiSCR           | MABp1: 6/10 (60%), PBO: 1/10 (10%)                                                       |
|                                |                            |                                        |                    |              |                                                      |                  |              | MSS             | p = 0.879                                                                                |
|                                |                            |                                        |                    | PBO          | X                                                    | 49.3(9.8)        | 6/4          | VAS             | p = 0.091                                                                                |
|                                |                            |                                        |                    |              |                                                      |                  |              | VAS for<br>pain | p = 0.255                                                                                |
| Tzanetakou<br>2016,<br>Greece  | NCT 01558375               | Mar. 2012 -<br>Feb. 2014<br>/ 12 weeks | Hurley<br>II/III   | Anakinra     | 100mg QD                                             | 42.3(13.8)       | 5/4          | HiSCR           | Anakinra: 7/9(78%), PBO: 3/10(30%)                                                       |
|                                |                            |                                        |                    |              |                                                      |                  |              | SS              | p > .05                                                                                  |
|                                |                            |                                        |                    | PBO          | X                                                    | 36.0(11.3)       | 5/5          | DLQI            | p > .05                                                                                  |
|                                |                            |                                        |                    |              |                                                      |                  |              | VAS             | p > .05 (for pain: p > .05)                                                              |

**Table S2.** *Cont.*

| Author,<br>year,<br>country                                              | Registration                  | Period /<br>Primary<br>endpoint        | Severity         | Intervention | Dose                            | Mean<br>age (SD) | Sex<br>(M/F) | Tool         | Result                                                                             |
|--------------------------------------------------------------------------|-------------------------------|----------------------------------------|------------------|--------------|---------------------------------|------------------|--------------|--------------|------------------------------------------------------------------------------------|
| Kimball<br>2016, USA,<br>Europe,<br>Australia,<br>Puerto Rico,<br>Turkey | NCT<br>01468207<br>PIONEER I  | Nov. 2011<br>– Jan. 2014<br>/ 12 weeks | Hurley<br>II/III | ADA          | 160mg W0<br>→80mgW2<br>→40mg QW | 36.2<br>(10.8)   | 62/91        | HiSCR        | ADA: 64/153(41.8%); PBO:40/154(26%)                                                |
|                                                                          |                               |                                        |                  |              |                                 |                  |              | MSS          | ADA: 125.8; PBO: 130.5<br>Mean change: ADA: -24.4; PBO: -15.7                      |
|                                                                          |                               |                                        |                  | PBO          | X                               | 37.8<br>(11.3)   | 49/<br>105   | DLQI         | 0/1: ADA: 10/153(6.5%), PBO: 2/154(1.3%);<br>Mean change: ADA: -5.4, PBO: -2.9     |
|                                                                          |                               |                                        |                  |              |                                 |                  |              | PtGA         | Mean change: ADA: -1.3, PBO: -0.7                                                  |
|                                                                          |                               |                                        |                  |              |                                 |                  |              | WPAI-<br>SHP | Mean change: Overall work/activity impairment:<br>ADA: -13.4/-14; PBO: -9.9/-8.3   |
|                                                                          |                               |                                        |                  |              |                                 |                  |              | TSQM         | Mean change: Global satisfaction: ADA 17; PBO: 8.4                                 |
|                                                                          |                               |                                        |                  |              |                                 |                  |              | SF-36        | Mean change: Physical/Mental component summary:<br>ADA: 4.2/2.3; PBO: 1.5/1.3      |
|                                                                          |                               |                                        |                  |              |                                 |                  |              | HADS         | Mean change: Anxiety/Depression:<br>ADA: -1.4/-1.5; PBO: -0.8/-1.0                 |
| Kimball<br>2016, USA,<br>Europe,<br>Australia,<br>Puerto Rico,<br>Turkey | NCT<br>01468233<br>PIONEER II | Dec. 2011<br>–Apr. 2014<br>/ 12 weeks  | Hurley<br>II/III | ADA          | 160mg W0<br>→80mgW2<br>→40mg QW | 34.9<br>(10.0)   | 55/<br>108   | HiSCR        | ADA:96/163(58.9%); PBO: 45/163(27.6%)                                              |
|                                                                          |                               |                                        |                  |              |                                 |                  |              | MSS          | ADA: 81.4; PBO: 115.2<br>Mean chabge: ADA: -28.9; PBO: -9.5                        |
|                                                                          |                               |                                        |                  | PBO          | X                               | 36.1<br>(12.2)   | 50/<br>113   | DLQI         | 0/1: ADA: 13/163(8%), PBO: 4/163(2.5%);<br>Mean change: ADA: -5.1, PBO: -2.3       |
|                                                                          |                               |                                        |                  |              |                                 |                  |              | PtGA         | Mean change: ADA: -2.3, PBO: -0.7                                                  |
|                                                                          |                               |                                        |                  |              |                                 |                  |              | WPAI-<br>SHP | Mean change: Overall work/activity impairment:<br>ADA: -13.4/-14.5; PBO: -5.9/-7.2 |
|                                                                          |                               |                                        |                  |              |                                 |                  |              | TSQM         | Mean change: Global satisfaction: ADA: 22.7; PBO: 8.6                              |
|                                                                          |                               |                                        |                  |              |                                 |                  |              | EQ-5D        | Mean change: ADA: 0.1; PBO: 0                                                      |

Table S2. Cont.

| Author, year, country     | Registration | Period / Primary endpoint        | Severity               | Intervention | Dose                     | Mean age (SD) | Sex (M/F) | Tool       | Result                                                                                 |
|---------------------------|--------------|----------------------------------|------------------------|--------------|--------------------------|---------------|-----------|------------|----------------------------------------------------------------------------------------|
| Kimball 2012, USA, Europe | NCT 00918255 | Apr. 2009 – Nov. 2010 / 16 weeks | HS-PGA Moderate/Severe | ADA (ew)     | 160mg D0→80mg W2→40mg QW | 35.1 (10.7)   | 15/ 36    | HiSCR      | ADAew/eow: 24/44% (54.5%), ADAeow: 15/45 (33.3%), PBO: 11/43 (25.6%) (post hoc)        |
|                           |              |                                  |                        | ADA (eow)    | 80mg W0→40mg Q2W         | 36.1 (12.5)   | 14/ 38    | HS-PGA     | ADAew: 9/51(17.6%), ADAeow: 5/52(9.6%), PBO: 2/51(3.9%)                                |
|                           |              |                                  |                        |              |                          |               |           | MSS        | Mean Change: ADAew: -40.2(9.8), ADAeow: -32(9.5), PBO: 17.2(9.8)                       |
|                           |              |                                  |                        |              |                          |               |           | DLQI       | Mean Change: ADAew: -6.3(0.9), ADAeow: -3.2(0.8), PBO: -2.3(0.9)                       |
|                           |              |                                  |                        | PBO          | X                        | 37.8 (12.1)   | 15/ 36    | VAS (pain) | ≥30% and 10-mm reduction: ADAew: 23/48(47.9%), ADAeow: 17/47(36.2%), PBO: 13/48(27.1%) |
| Miller 2011, Denmark      | NA           | 2007 – Jul. 2010 / 12 weeks      | Hurley II/III          | ADA          | 80mg W0→40mg Q2W         | 38.7          | 3/ 12     | SS         | Mean change: ADA: -11.27, PBO: 5.83                                                    |
|                           |              |                                  |                        |              |                          |               |           | Hurley     | Mean change: ADA: -0.13, PBO: 0                                                        |
|                           |              |                                  |                        | PBO          | X                        | 40.2          | 1/5       | DLQI       | Mean change: ADA: -3.67, PBO: 1.0                                                      |
|                           |              |                                  |                        |              |                          |               |           | VAS        | Mean change: ADA: -13.4, PBO: 3.17                                                     |
| Adams 2010, USA           | NCT 00949546 | NA / 12 weeks                    | Moderate to severe     | Etanercept   | 50mg BIW                 | 40            | 4/6       | PGA        | p > .99                                                                                |
|                           |              |                                  |                        | PBO          | X                        | 36.7          | 3/7       | DLQI       | p = .12                                                                                |
| Grant 2010, USA           | NCT 00795574 | NA / 8 weeks                     | HSSI moderate / severe | Infliximab   | 5mg/kg at W0,2,6         | 34 (13.44)    | 3/ 12     | HSSI       | ≥50% decrease: p=.092                                                                  |
|                           |              |                                  |                        |              |                          |               |           | DLQI       | Mean change: infliximab: -10, PBO: -1.6                                                |
|                           |              |                                  |                        | PBO          | X                        | 33.2 (11.42)  | 9/ 14     | PGA        | Infliximab: 1.8, PBO: 4.7                                                              |
|                           |              |                                  |                        |              |                          |               |           | VAS        | Mean change: infliximab: -39.8, PBO: -0.6                                              |

ADA = adalimumab; BID = twice daily; BIW = twice weekly; DLQI= Dermatology life quality index; EW= Every week; Eow = Every other week; HADS= Hospital anxiety and depression scale; HiSCR= Hidradenitis suppurativa clinical response; HiSQoL = Hidradenitis Suppurativa Quality of Life Score; HSIA= Hidradenitis suppurativa impact assessment; HS-IGA= Hidradenitis suppurativa-investigator's global assessment; HS-PGA= Hidradenitis suppurativa physician global assessment; HSSA= Hidradenitis suppurativa symptom assessment; HSSD= Hidradenitis suppurativa symptom diary; HSSI= Hidradenitis suppurativa severity index; IHS4= Hidradenitis suppurativa severity score system; MSS= Modified Sartorius score; NRS= Numeric rating scale; PBO = placebo; PGA= Physician global assessment; PtGA= Patients' global assessment; QD = everyday; Q2W = every other week; Q4W = every four week; QW: every week; SF-36=



---

Short form-36 health status survey; SS= Sartotius score; TSQM= Treatment satisfaction questionnaire for medication; VAS= Visual analogue scale, W = Week, WPAI-SHP: Work productivity and activity impairment questionnaire: specific health problem
